# Supplementary material for: Metabolic Profiling and Flux Analysis of MEL-2 Human Embryonic Stem Cells during Exponential Growth at Physiological and Atmospheric Oxygen Concentrations
Source: PubMed Central journal article supplement (PMC4239018; doi:10.1371/journal.pone.0112757), 2014-11-20
Supplement: pone.0112757.s002.pdf [file pone.0112757.s002.pdf]

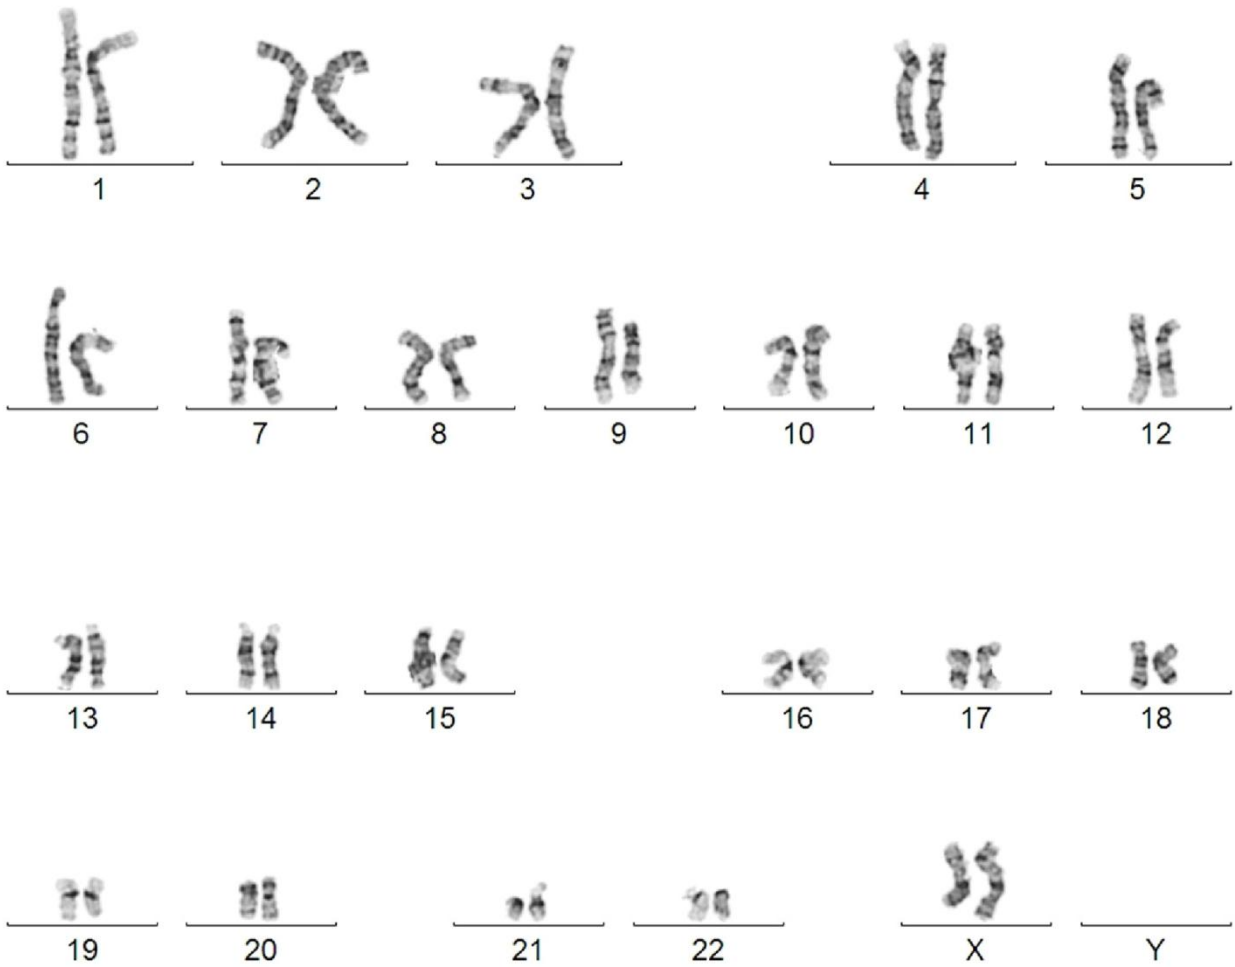

**Figure S3. Karyotype analysis of human embryonic stem cell line.**

Karyotype analysis was conducted on the MEL-2 hESC cell stocks at p18+2+15 after experiments were conducted. Female karyotype with no abnormalities was detected for 25 cells tested.
