# Supplementary material for: Metabolic Profiling and Flux Analysis of MEL-2 Human Embryonic Stem Cells during Exponential Growth at Physiological and Atmospheric Oxygen Concentrations
Source: PubMed Central journal article supplement (PMC4239018; doi:10.1371/journal.pone.0112757), 2014-11-20
Supplement: pone.0112757.s005.pdf [file pone.0112757.s005.pdf]

## Results of the metabolic flux analysis

The MFA model consisted of over 2000 reactions. Of these reactions 288 were considered essential for hESC metabolism. The metabolic reactions modelled within the MFA can be broken into six categories;

- Biosynthesis – reactions directly involved with synthesising biomass;
- Amino acid catabolism;
- Central pathway – metabolism pathways present in all three domains of life;
- Energy – reactions involved with the production of ATP;
- Transport – transport of metabolites within the cell, eg from cytoplasm to the mitochondria; and
- Exchange – transport of metabolites into and out of the cell.

The flux through these reactions in hESCs cultured at both physiological and atmospheric oxygen concentrations are given in Table S1.

Note: Reaction ID or component followed by ‘\_mt’ indicates that the reaction takes place or the reactant is located within the mitochondria.

Table S1. Flux through reactions considered essential for hESC metabolism

| Reaction ID | Reaction                                                              | Category     | Flux at 2% oxygen<br>(mmol/gDW) |                     | Flux at 20% oxygen<br>(mmol/gDW) |                     | Significant<br>difference |
|-------------|-----------------------------------------------------------------------|--------------|---------------------------------|---------------------|----------------------------------|---------------------|---------------------------|
|             |                                                                       |              | Lower & upper bound             | Lower & upper bound | Lower & upper bound              | Lower & upper bound |                           |
| EF0001      | alpha-D-Glucose_ext = alpha-D-Glucose                                 | Exchange     | 53.06                           | 53.10               | 33.16                            | 33.21               | Yes                       |
| EF0002      | ATP + H2O = ADP + Orthophosphate                                      | Energy       | 215.00                          | 216.40              | 218.00                           | 219.53              | Yes                       |
| EF0003      | CO2 = CO2_ext                                                         | Exchange     | 32.73                           | 33.15               | 43.68                            | 44.14               | Yes                       |
| EF0004      | (S)-Lactate = (S)-Lactate_ext                                         | Exchange     | 101.31                          | 101.40              | 66.35                            | 66.45               | Yes                       |
| EF0005      | Oxygen_ext = Oxygen                                                   | Exchange     | 31.23                           | 31.75               | 39.85                            | 40.46               | Yes                       |
| EF0006      | L-Alanine = L-Alanine_ext                                             | Exchange     | 1.92                            | 2.01                | 0.74                             | 0.84                | Yes                       |
| EF0007      | L-Aspartate_ext = L-Aspartate                                         | Exchange     | 0.17                            | 0.26                | 0.01                             | 0.10                | Yes                       |
| EF0008      | L-Asparagine_ext = L-Asparagine                                       | Exchange     | 0.24                            | 0.31                | 0.13                             | 0.21                | Yes                       |
| EF0009      | L-Glutamine_ext = L-Glutamine                                         | Exchange     | 3.06                            | 3.12                | 8.05                             | 8.12                | Yes                       |
| EF0010      | L-Glutamate = L-Glutamate_ext                                         | Exchange     | 0.43                            | 0.49                | 0.41                             | 0.48                | No                        |
| EF0011      | L-Serine_ext = L-Serine                                               | Exchange     | 1.54                            | 1.65                | 1.30                             | 1.41                | Yes                       |
| EF0012      | NH3 = NH3_ext                                                         | Exchange     | 9.49                            | 10.12               | 19.25                            | 19.89               | Yes                       |
| EF0015      | H2O_ext = H2O                                                         | Exchange     | -37.48                          | -36.20              | -34.23                           | -32.63              | Yes                       |
| EF0017      | L-Valine_ext = L-Valine                                               | Exchange     | 0.65                            | 0.70                | 0.67                             | 0.72                | No                        |
| EF0018      | L-Isoleucine_ext = L-Isoleucine                                       | Exchange     | 0.81                            | 0.85                | 0.74                             | 0.78                | Yes                       |
| EF0019      | L-Leucine_ext = L-Leucine                                             | Exchange     | 0.96                            | 1.00                | 0.89                             | 0.93                | Yes                       |
| EF0020      | L-Arginine_ext = L-Arginine                                           | Exchange     | 2.42                            | 2.47                | 2.10                             | 2.16                | Yes                       |
| EF0021      | L-Threonine_ext = L-Threonine                                         | Exchange     | 0.44                            | 0.51                | 0.52                             | 0.59                | Yes                       |
| EF0022      | L-Lysine_ext = L-Lysine                                               | Exchange     | 0.70                            | 0.74                | 0.56                             | 0.61                | Yes                       |
| EF0023      | L-Cysteine_ext = L-Cysteine                                           | Exchange     | 0.16                            | 0.27                | 0.14                             | 0.26                | No                        |
| EF0024      | L-Methionine_ext = L-Methionine                                       | Exchange     | 0.22                            | 0.27                | 0.20                             | 0.26                | No                        |
| EF0025      | L-Phenylalanine_ext = L-Phenylalanine                                 | Exchange     | 0.30                            | 0.34                | 0.31                             | 0.36                | No                        |
| EF0026      | L-Tyrosine_ext = L-Tyrosine                                           | Exchange     | 0.24                            | 0.28                | 0.27                             | 0.31                | No                        |
| EF0027      | L-Tryptophan_ext = L-Tryptophan                                       | Exchange     | 0.07                            | 0.09                | 0.09                             | 0.11                | Yes                       |
| EF0028      | L-Histidine_ext = L-Histidine                                         | Exchange     | 0.14                            | 0.20                | 0.14                             | 0.21                | No                        |
| EF0029      | Urea = Urea_ext                                                       | Exchange     | 2.15                            | 2.52                | 1.84                             | 2.22                | No                        |
| BIO003      | 1-Phosphatidyl-D-myo-inositol = 1-Phosphatidyl-D-myo-inositol_biomass | Biosynthesis | 0.02                            | 0.02                | 0.02                             | 0.02                | No                        |
| BIO004      | Phosphatidylcholine = Phosphatidylcholine_biomass                     | Biosynthesis | 0.13                            | 0.13                | 0.13                             | 0.13                | No                        |
| BIO005      | Phosphatidylserine = Phosphatidylserine_biomass                       | Biosynthesis | 0.01                            | 0.01                | 0.01                             | 0.01                | No                        |
| BIO006      | Phosphatidylethanolamine = Phosphatidylethanolamine_biomass           | Biosynthesis | 0.05                            | 0.05                | 0.05                             | 0.05                | No                        |
| BIO007      | Cardiolipin = Cardiolipin_biomass                                     | Biosynthesis | 0.01                            | 0.01                | 0.01                             | 0.01                | No                        |
| BIO008      | ATP = ATP_biomass + Pyrophosphate                                     | Biosynthesis | 0.06                            | 0.06                | 0.06                             | 0.06                | No                        |
| BIO009      | GTP = GTP_biomass + Pyrophosphate                                     | Biosynthesis | 0.11                            | 0.11                | 0.11                             | 0.11                | No                        |
| BIO010      | dATP = dATP_biomass + Pyrophosphate                                   | Biosynthesis | 0.03                            | 0.03                | 0.03                             | 0.03                | No                        |
| BIO011      | dGTP = dGTP_biomass + Pyrophosphate                                   | Biosynthesis | 0.02                            | 0.02                | 0.02                             | 0.02                | No                        |
| BIO012      | CTP = CTP_biomass + Pyrophosphate                                     | Biosynthesis | 0.10                            | 0.10                | 0.10                             | 0.10                | No                        |
| BIO013      | UTP = UTP_biomass + Pyrophosphate                                     | Biosynthesis | 0.06                            | 0.06                | 0.06                             | 0.06                | No                        |
| BIO014      | dCTP = dCTP_biomass + Pyrophosphate                                   | Biosynthesis | 0.02                            | 0.02                | 0.02                             | 0.02                | No                        |

| Reaction ID | Reaction                                                                                                                                                                                                                                                                                                                                                                                                                                                                                                                                                                                                                                                                                                                                                                                                                                                                                                                                                                                                                                                                                                    | Category     | Flux at 2% oxygen<br>(mmol/gDW) |                     | Flux at 20% oxygen<br>(mmol/gDW) |                     | Significant<br>difference |
|-------------|-------------------------------------------------------------------------------------------------------------------------------------------------------------------------------------------------------------------------------------------------------------------------------------------------------------------------------------------------------------------------------------------------------------------------------------------------------------------------------------------------------------------------------------------------------------------------------------------------------------------------------------------------------------------------------------------------------------------------------------------------------------------------------------------------------------------------------------------------------------------------------------------------------------------------------------------------------------------------------------------------------------------------------------------------------------------------------------------------------------|--------------|---------------------------------|---------------------|----------------------------------|---------------------|---------------------------|
|             |                                                                                                                                                                                                                                                                                                                                                                                                                                                                                                                                                                                                                                                                                                                                                                                                                                                                                                                                                                                                                                                                                                             |              | Lower & upper bound             | Lower & upper bound | Lower & upper bound              | Lower & upper bound |                           |
| BIO015      | dTTP = dTTP_biomass + Pyrophosphate                                                                                                                                                                                                                                                                                                                                                                                                                                                                                                                                                                                                                                                                                                                                                                                                                                                                                                                                                                                                                                                                         | Biosynthesis | 0.03                            | 0.03                | 0.03                             | 0.03                | No                        |
| BIO016      | Cholesterol = Cholesterol_biomass                                                                                                                                                                                                                                                                                                                                                                                                                                                                                                                                                                                                                                                                                                                                                                                                                                                                                                                                                                                                                                                                           | Biosynthesis | 0.03                            | 0.03                | 0.03                             | 0.03                | No                        |
| BIO017      | Sphingomyelin = Sphingomyelin_biomass                                                                                                                                                                                                                                                                                                                                                                                                                                                                                                                                                                                                                                                                                                                                                                                                                                                                                                                                                                                                                                                                       | Biosynthesis | 0.02                            | 0.02                | 0.02                             | 0.02                | No                        |
| BIO018      | Phosphatidylglycerol = Phosphatidylglycerol_biomass                                                                                                                                                                                                                                                                                                                                                                                                                                                                                                                                                                                                                                                                                                                                                                                                                                                                                                                                                                                                                                                         | Biosynthesis | 0.00                            | 0.00                | 0.00                             | 0.00                | Yes                       |
| BIO019      | Amylose = Amylose_biomass                                                                                                                                                                                                                                                                                                                                                                                                                                                                                                                                                                                                                                                                                                                                                                                                                                                                                                                                                                                                                                                                                   | Biosynthesis | 0.34                            | 0.34                | 0.34                             | 0.34                | No                        |
| BIO028      | 0.468 L-Alanyl-tRNA + 0.28 L-Aspartyl-tRNA(Asn) + 0.225 L-Asparaginyl-tRNA(Asn) + 0.301 L-Glutamyl-tRNA(Gln) + 0.251 Glutaminy-tRNA + 0.42 Glycyl-tRNA(Gly) + 0.244 L-Prolyl-tRNA(Pro) + 0.336 L-Seryl-tRNA(Ser) + 0.325 L-Valyl-tRNA(Val) + 0.253 L-Isoleucyl-tRNA(Ile) + 0.44 L-Leucyl-tRNA + 0.294 L-Arginyl-tRNA(Arg) + 0.301 L-Threonyl-tRNA(Thr) + 0.445 L-Lysyl-tRNA + 0.113 L-Cysteinyl-tRNA(Cys) + 0.108 L-Methionyl-tRNA + 0.171 L-Phenylalanyl-tRNA(Phe) + 0.142 L-Tyrosyl-tRNA(Tyr) + 0.034 L-Tryptophanyl-tRNA(Trp) + 0.112 L-Histidyl-tRNA(His) + 0.021 1-Phosphatidyl-D-myo-inositol_biomass + 0.144 Phosphatidylcholine_biomass + 0.006 Phosphatidylserine_biomass + 0.054 Phosphatidylethanolamine_biomass + 0.006 Cardiolipin_biomass + 0.064 ATP_biomass + 0.121 GTP_biomass + 0.037 dATP_biomass + 0.025 dGTP_biomass + 0.107 CTP_biomass + 0.064 UTP_biomass + 0.025 dCTP_biomass + 0.037 dTTP_biomass + 0.038 Cholesterol_biomass + 0.017 Sphingomyelin_biomass + 0.002 Phosphatidylglycerol_biomass + 0.374 Amylose_biomass + 12.14 ATP = Biomass + 12.14 ADP + 12.14 Orthophosphate | Biosynthesis | 0.90                            | 0.90                | 0.90                             | 0.91                | No                        |
| R02918      | ATP + L-Tyrosine + tRNA(Tyr) = AMP + Pyrophosphate + L-Tyrosyl-tRNA(Tyr)                                                                                                                                                                                                                                                                                                                                                                                                                                                                                                                                                                                                                                                                                                                                                                                                                                                                                                                                                                                                                                    | Biosynthesis | 0.13                            | 0.13                | 0.13                             | 0.13                | No                        |
| R03038      | ATP + L-Alanine + tRNA(Ala) = AMP + Pyrophosphate + L-Alanyl-tRNA                                                                                                                                                                                                                                                                                                                                                                                                                                                                                                                                                                                                                                                                                                                                                                                                                                                                                                                                                                                                                                           | Biosynthesis | 0.42                            | 0.42                | 0.42                             | 0.42                | No                        |
| R03646      | ATP + L-Arginine + tRNA(Arg) = AMP + Pyrophosphate + L-Arginyl-tRNA(Arg)                                                                                                                                                                                                                                                                                                                                                                                                                                                                                                                                                                                                                                                                                                                                                                                                                                                                                                                                                                                                                                    | Biosynthesis | 0.26                            | 0.27                | 0.26                             | 0.27                | No                        |
| R03647      | ATP + L-Aspartate + tRNA(Asn) = AMP + Pyrophosphate + L-Aspartyl-tRNA(Asn)                                                                                                                                                                                                                                                                                                                                                                                                                                                                                                                                                                                                                                                                                                                                                                                                                                                                                                                                                                                                                                  | Biosynthesis | 0.25                            | 0.25                | 0.25                             | 0.25                | No                        |
| R03648      | ATP + L-Asparagine + tRNA(Asn) = AMP + Pyrophosphate + L-Asparaginyl-tRNA(Asn)                                                                                                                                                                                                                                                                                                                                                                                                                                                                                                                                                                                                                                                                                                                                                                                                                                                                                                                                                                                                                              | Biosynthesis | 0.20                            | 0.20                | 0.20                             | 0.20                | No                        |
| R03650      | ATP + L-Cysteine + tRNA(Cys) = AMP + Pyrophosphate + L-Cysteinyl-tRNA(Cys)                                                                                                                                                                                                                                                                                                                                                                                                                                                                                                                                                                                                                                                                                                                                                                                                                                                                                                                                                                                                                                  | Biosynthesis | 0.10                            | 0.10                | 0.10                             | 0.10                | No                        |
| R03651      | ATP + L-Glutamate + tRNA(Gln) = AMP + Pyrophosphate + L-Glutamyl-tRNA(Gln)                                                                                                                                                                                                                                                                                                                                                                                                                                                                                                                                                                                                                                                                                                                                                                                                                                                                                                                                                                                                                                  | Biosynthesis | 0.27                            | 0.27                | 0.27                             | 0.27                | No                        |
| R03652      | ATP + L-Glutamine + tRNA(Gln) = AMP + Pyrophosphate + Glutaminy-tRNA                                                                                                                                                                                                                                                                                                                                                                                                                                                                                                                                                                                                                                                                                                                                                                                                                                                                                                                                                                                                                                        | Biosynthesis | 0.23                            | 0.23                | 0.23                             | 0.23                | No                        |
| R03654      | ATP + Glycine + tRNA(Gly) = AMP + Pyrophosphate + Glycyl-tRNA(Gly)                                                                                                                                                                                                                                                                                                                                                                                                                                                                                                                                                                                                                                                                                                                                                                                                                                                                                                                                                                                                                                          | Biosynthesis | 0.38                            | 0.38                | 0.38                             | 0.38                | No                        |
| R03655      | ATP + L-Histidine + tRNA(His) = AMP + Pyrophosphate + L-Histidyl-tRNA(His)                                                                                                                                                                                                                                                                                                                                                                                                                                                                                                                                                                                                                                                                                                                                                                                                                                                                                                                                                                                                                                  | Biosynthesis | 0.10                            | 0.10                | 0.10                             | 0.10                | No                        |
| R03656      | ATP + L-Isoleucine + tRNA(Ile) = AMP + Pyrophosphate + L-Isoleucyl-tRNA(Ile)                                                                                                                                                                                                                                                                                                                                                                                                                                                                                                                                                                                                                                                                                                                                                                                                                                                                                                                                                                                                                                | Biosynthesis | 0.23                            | 0.23                | 0.23                             | 0.23                | No                        |
| R03657      | ATP + L-Leucine + tRNA(Leu) = AMP + Pyrophosphate + L-Leucyl-tRNA                                                                                                                                                                                                                                                                                                                                                                                                                                                                                                                                                                                                                                                                                                                                                                                                                                                                                                                                                                                                                                           | Biosynthesis | 0.40                            | 0.40                | 0.40                             | 0.40                | No                        |
| R03658      | ATP + L-Lysine + tRNA(Lys) = AMP + Pyrophosphate + L-Lysyl-tRNA                                                                                                                                                                                                                                                                                                                                                                                                                                                                                                                                                                                                                                                                                                                                                                                                                                                                                                                                                                                                                                             | Biosynthesis | 0.40                            | 0.40                | 0.40                             | 0.40                | No                        |
| R03659      | ATP + L-Methionine + tRNA(Met) = AMP + Pyrophosphate + L-Methionyl-tRNA                                                                                                                                                                                                                                                                                                                                                                                                                                                                                                                                                                                                                                                                                                                                                                                                                                                                                                                                                                                                                                     | Biosynthesis | 0.10                            | 0.10                | 0.10                             | 0.10                | No                        |
| R03660      | ATP + L-Phenylalanine + tRNA(Phe) = AMP + Pyrophosphate + L-Phenylalanyl-tRNA(Phe)                                                                                                                                                                                                                                                                                                                                                                                                                                                                                                                                                                                                                                                                                                                                                                                                                                                                                                                                                                                                                          | Biosynthesis | 0.15                            | 0.15                | 0.15                             | 0.15                | No                        |
| R03661      | ATP + L-Proline + tRNA(Pro) = AMP + Pyrophosphate + L-Prolyl-tRNA(Pro)                                                                                                                                                                                                                                                                                                                                                                                                                                                                                                                                                                                                                                                                                                                                                                                                                                                                                                                                                                                                                                      | Biosynthesis | 0.22                            | 0.22                | 0.22                             | 0.22                | No                        |
| R03662      | ATP + L-Serine + tRNA(Ser) = AMP + Pyrophosphate + L-Seryl-tRNA(Ser)                                                                                                                                                                                                                                                                                                                                                                                                                                                                                                                                                                                                                                                                                                                                                                                                                                                                                                                                                                                                                                        | Biosynthesis | 0.30                            | 0.30                | 0.30                             | 0.30                | No                        |
| R03663      | ATP + L-Threonine + tRNA(Thr) = AMP + Pyrophosphate + L-Threonyl-tRNA(Thr)                                                                                                                                                                                                                                                                                                                                                                                                                                                                                                                                                                                                                                                                                                                                                                                                                                                                                                                                                                                                                                  | Biosynthesis | 0.27                            | 0.27                | 0.27                             | 0.27                | No                        |
| R03664      | ATP + L-Tryptophan + tRNA(Trp) = AMP + Pyrophosphate + L-Tryptophanyl-tRNA(Trp)                                                                                                                                                                                                                                                                                                                                                                                                                                                                                                                                                                                                                                                                                                                                                                                                                                                                                                                                                                                                                             | Biosynthesis | 0.03                            | 0.03                | 0.03                             | 0.03                | No                        |
| R03665      | ATP + L-Valine + tRNA(Val) = AMP + Pyrophosphate + L-Valyl-tRNA(Val)                                                                                                                                                                                                                                                                                                                                                                                                                                                                                                                                                                                                                                                                                                                                                                                                                                                                                                                                                                                                                                        | Biosynthesis | 0.29                            | 0.29                | 0.29                             | 0.29                | No                        |
| TF0004      | L-Glutamine = L-Glutamine_mt                                                                                                                                                                                                                                                                                                                                                                                                                                                                                                                                                                                                                                                                                                                                                                                                                                                                                                                                                                                                                                                                                | Transport    | 1.27                            | 1.99                | 6.21                             | 6.99                | Yes                       |
| TF0008      | Oxygen = Oxygen_mt                                                                                                                                                                                                                                                                                                                                                                                                                                                                                                                                                                                                                                                                                                                                                                                                                                                                                                                                                                                                                                                                                          | Transport    | 23.80                           | 29.78               | 29.32                            | 38.25               | No                        |

| Reaction ID | Reaction                                                                                                 | Category        | Flux at 2% oxygen<br>(mmol/gDW) |                     | Flux at 20% oxygen<br>(mmol/gDW) |                     | Significant<br>difference |
|-------------|----------------------------------------------------------------------------------------------------------|-----------------|---------------------------------|---------------------|----------------------------------|---------------------|---------------------------|
|             |                                                                                                          |                 | Lower & upper bound             | Lower & upper bound | Lower & upper bound              | Lower & upper bound |                           |
| TF0009      | CO2 = CO2_mt                                                                                             | Transport       | -28.06                          | -10.97              | -38.81                           | -12.89              | No                        |
| TF0010      | ATP + ADP_mt = ATP_mt + ADP                                                                              | Transport       | -149.75                         | -115.69             | -192.88                          | -141.21             | No                        |
| TF0013      | H2O = H2O_mt                                                                                             | Transport       | -173.24                         | -141.65             | -211.50                          | -169.94             | No                        |
| TF0014      | NH3 = NH3_mt                                                                                             | Transport       | -9.05                           | -7.00               | -19.03                           | -17.32              | Yes                       |
| TF0017      | L-Valine = L-Valine_mt                                                                                   | Transport       | 0.36                            | 0.41                | 0.37                             | 0.43                | No                        |
| TF0018      | L-Leucine = L-Leucine_mt                                                                                 | Transport       | 0.56                            | 0.60                | 0.49                             | 0.53                | Yes                       |
| TF0019      | L-Isoleucine = L-Isoleucine_mt                                                                           | Transport       | 0.58                            | 0.62                | 0.51                             | 0.55                | Yes                       |
| TF0022      | L-Ornithine = L-Ornithine_mt                                                                             | Transport       | 1.79                            | 2.21                | 1.46                             | 1.90                | No                        |
| TF0024      | L-Threonine = L-Threonine_mt                                                                             | Transport       | 0.17                            | 0.24                | 0.24                             | 0.32                | Yes                       |
| TF0025      | L-Lysine = L-Lysine_mt                                                                                   | Transport       | 0.30                            | 0.34                | 0.16                             | 0.21                | Yes                       |
| TF0026      | L-2-Aminoadipate 6-semialdehyde = L-2-Aminoadipate 6-semialdehyde_mt                                     | Transport       | -0.34                           | -0.30               | -0.21                            | -0.16               | Yes                       |
| TF0028      | Acetoacetate = Acetoacetate_mt                                                                           | Transport       | -5.59                           | -0.94               | -6.04                            | -0.93               | No                        |
| TF0029      | 2-Oxobutanoate = 2-Oxobutanoate_mt                                                                       | Transport       | 0.12                            | 0.17                | 0.10                             | 0.16                | No                        |
| gCat03      | Hydantoin-5-propionate + Oxygen = N-Carbamyl-L-glutamate                                                 | AA catabolism   | 0.04                            | 0.10                | 0.04                             | 0.11                | No                        |
| gCat04      | N-Carbamyl-L-glutamate = L-Glutamate + NH3 + CO2                                                         | AA catabolism   | 0.04                            | 0.10                | 0.04                             | 0.11                | No                        |
| gCat07_mt   | CO2_mt + H2O_mt = HCO3-_mt + H+_mt                                                                       | Central pathway | 1.75                            | 3.48                | 1.62                             | 3.21                | No                        |
| gCat07      | CO2 + H2O = HCO3- + H+                                                                                   | Central pathway | 3.88                            | 5.56                | 3.88                             | 5.42                | No                        |
| K00006_mt   | NADH_mt + 0.5 Oxygen_mt + 2.5 ADP_mt + 2.5 Orthophosphate_mt + H+_mt = 2.5 ATP_mt + 3.5 H2O_mt + NAD+_mt | Energy          | 44.77                           | 47.56               | 55.99                            | 59.05               | Yes                       |
| K00007_mt   | FADH2_mt + 0.5 Oxygen_mt + 1.5 ADP_mt + 1.5 Orthophosphate_mt = 1.5 ATP_mt + 2.5 H2O_mt + FAD_mt         | Energy          | 2.74                            | 14.65               | 2.55                             | 20.38               | No                        |
| K00008      | (9Z)-Octadecenoic acid = Fatty acid                                                                      | Biosynthesis    | 0.45                            | 0.45                | 0.45                             | 0.45                | No                        |
| K00009      | ATP + Fatty acid + CoA = AMP + Acyl-CoA + Pyrophosphate                                                  | Biosynthesis    | 0.45                            | 1.14                | 0.45                             | 1.21                | No                        |
| K00010      | Acceptor + FADH2 = Reduced acceptor + FAD                                                                | Energy          | 0.06                            | 0.54                | 0.17                             | 0.55                | No                        |
| R00004      | Pyrophosphate + H2O = 2 Orthophosphate                                                                   | Central pathway | 7.40                            | 8.31                | 7.40                             | 8.38                | No                        |
| R00069      | Oxygen + 2 4-Imidazolone-5-propanoate = 2 Hydantoin-5-propionate                                         | AA catabolism   | 0.02                            | 0.05                | 0.02                             | 0.05                | No                        |
| R00156      | ATP + UDP = ADP + UTP                                                                                    | Biosynthesis    | 0.51                            | 8.20                | 0.51                             | 8.33                | No                        |
| R00158      | ATP + UMP = ADP + UDP                                                                                    | Biosynthesis    | 0.18                            | 1.61                | 0.18                             | 1.74                | No                        |
| R00177      | ATP + L-Methionine + H2O = Orthophosphate + Pyrophosphate + S-Adenosyl-L-methionine                      | Central pathway | 0.43                            | 0.56                | 0.43                             | 0.57                | No                        |
| R00192      | S-Adenosyl-L-homocysteine + H2O = Adenosine + L-Homocysteine                                             | AA catabolism   | 0.43                            | 0.56                | 0.44                             | 0.57                | No                        |
| R00200      | ADP + Phosphoenolpyruvate = ATP + Pyruvate                                                               | Central pathway | 103.29                          | 109.82              | 63.58                            | 74.17               | Yes                       |
| R00238_mt   | 2 Acetyl-CoA_mt = CoA_mt + Acetoacetyl-CoA_mt                                                            | Biosynthesis    | 0.33                            | 4.59                | 0.40                             | 5.21                | No                        |
| R00238      | 2 Acetyl-CoA = CoA + Acetoacetyl-CoA                                                                     | Biosynthesis    | -5.73                           | -1.47               | -6.22                            | -1.40               | No                        |
| R00243_mt   | L-Glutamate_mt + NAD+_mt + H2O_mt = 2-Oxoglutarate_mt + NH3_mt + NADH_mt + H+_mt                         | AA catabolism   | 5.01                            | 6.94                | 10.33                            | 11.89               | Yes                       |
| R00256_mt   | L-Glutamine_mt + H2O_mt = L-Glutamate_mt + NH3_mt                                                        | AA catabolism   | 1.27                            | 1.99                | 6.21                             | 6.99                | Yes                       |
| R00289      | UTP + alpha-D-Glucose 1-phosphate = Pyrophosphate + UDP-glucose                                          | Biosynthesis    | 0.34                            | 1.03                | 0.34                             | 1.10                | No                        |
| R00292      | UDP-glucose = UDP + Amylose                                                                              | Biosynthesis    | 0.34                            | 0.34                | 0.34                             | 0.34                | No                        |
| R00332      | ATP + GMP = ADP + GDP                                                                                    | Biosynthesis    | 0.11                            | 1.53                | 0.11                             | 1.67                | No                        |
| R00342_mt   | (S)-Malate_mt + NAD+_mt = Oxaloacetate_mt + NADH_mt + H+_mt                                              | Central pathway | 7.40                            | 27.10               | 3.62                             | 31.30               | No                        |
| R00410      | Succinyl-CoA + Acetoacetate = Succinate + Acetoacetyl-CoA                                                | AA catabolism   | 1.28                            | 5.93                | 1.32                             | 6.43                | No                        |

| Reaction ID | Reaction                                                                                                         | Category        | Flux at 2% oxygen<br>(mmol/gDW) |                     | Flux at 20% oxygen<br>(mmol/gDW) |                     | Significant<br>difference |
|-------------|------------------------------------------------------------------------------------------------------------------|-----------------|---------------------------------|---------------------|----------------------------------|---------------------|---------------------------|
|             |                                                                                                                  |                 | Lower & upper bound             | Lower & upper bound | Lower & upper bound              | Lower & upper bound |                           |
| R00412_mt   | FAD_mt + Succinate_mt = FADH2_mt + Fumarate_mt                                                                   | Central pathway | 1.15                            | 12.20               | 1.08                             | 17.74               | No                        |
| R00551      | L-Arginine + H2O = L-Ornithine + Urea                                                                            | AA catabolism   | 2.15                            | 2.21                | 1.84                             | 1.90                | Yes                       |
| R00573      | ATP + UTP + L-Glutamine + H2O = ADP + Orthophosphate + CTP + L-Glutamate                                         | Biosynthesis    | 0.12                            | 0.83                | 0.12                             | 0.90                | No                        |
| R00575      | 2 ATP + L-Glutamine + HCO3- + H2O = 2 ADP + Orthophosphate + L-Glutamate + Carbamoyl phosphate                   | Biosynthesis    | 0.21                            | 0.21                | 0.21                             | 0.21                | No                        |
| R00658      | 2-Phospho-D-glycerate = Phosphoenolpyruvate + H2O                                                                | Central pathway | 103.29                          | 105.01              | 63.58                            | 65.18               | Yes                       |
| R00667_mt   | L-Ornithine_mt + 2-Oxoglutarate_mt = L-Glutamate 5-semialdehyde_mt + L-Glutamate_mt                              | AA catabolism   | 1.79                            | 2.21                | 1.46                             | 1.90                | No                        |
| R00678      | L-Tryptophan + Oxygen = L-Formylkynurenine                                                                       | AA catabolism   | 0.04                            | 0.06                | 0.06                             | 0.08                | No                        |
| R00702      | 2 trans,trans-Farnesyl diphosphate = Pyrophosphate + Presqualene diphosphate + H+                                | Biosynthesis    | 0.03                            | 0.03                | 0.03                             | 0.03                | No                        |
| R00703      | (S)-Lactate + NAD+ = Pyruvate + NADH + H+                                                                        | Central pathway | -101.40                         | -101.31             | -66.45                           | -66.35              | Yes                       |
| R00707_mt   | L-Glutamate 5-semialdehyde_mt + NAD+_mt + H2O_mt = L-Glutamate_mt + NADH_mt + H+_mt                              | AA catabolism   | 1.39                            | 3.20                | 1.29                             | 3.26                | No                        |
| R00709_mt   | Isocitrate_mt + NAD+_mt = 2-Oxoglutarate_mt + CO2_mt + NADH_mt + H+_mt                                           | Central pathway | 4.98                            | 6.79                | 5.77                             | 7.45                | No                        |
| R00716_mt   | L-Lysine_mt + 2-Oxoglutarate_mt + NADPH_mt + H+_mt = N6-(L-1,3-Dicarboxypropyl)-L-lysine_mt + NADP+_mt + H2O_mt  | AA catabolism   | 0.30                            | 0.34                | 0.16                             | 0.21                | Yes                       |
| R00734      | L-Tyrosine + 2-Oxoglutarate = 3-(4-Hydroxyphenyl)pyruvate + L-Glutamate                                          | AA catabolism   | 0.30                            | 0.34                | 0.34                             | 0.39                | Yes                       |
| R00742      | ATP + Acetyl-CoA + HCO3- = ADP + Orthophosphate + Malonyl-CoA                                                    | Biosynthesis    | 3.67                            | 5.07                | 3.67                             | 5.21                | No                        |
| R00782      | L-Cysteine + H2O = Hydrogen sulfide + Pyruvate + NH3                                                             | AA catabolism   | 0.23                            | 0.34                | 0.20                             | 0.32                | No                        |
| R00833_mt   | (R)-2-Methyl-3-oxopropanoyl-CoA_mt = Succinyl-CoA_mt                                                             | AA catabolism   | 1.15                            | 1.44                | 1.08                             | 1.46                | No                        |
| R00840      | 1L-myo-Inositol 1-phosphate = alpha-D-Glucose 6-phosphate                                                        | Biosynthesis    | -0.02                           | -0.02               | -0.02                            | -0.02               | No                        |
| R00851      | sn-Glycerol 3-phosphate + Acyl-CoA = 1-Acyl-sn-glycerol 3-phosphate + CoA                                        | Biosynthesis    | 0.22                            | 0.49                | 0.22                             | 0.52                | No                        |
| R00927_mt   | CoA_mt + 2-Methylacetoacetyl-CoA_mt = Propanoyl-CoA_mt + Acetyl-CoA_mt                                           | AA catabolism   | 0.58                            | 0.62                | 0.51                             | 0.55                | Yes                       |
| R00935_mt   | (S)-Methylmalonate semialdehyde_mt + CoA_mt + NAD+_mt = Propanoyl-CoA_mt + CO2_mt + NADH_mt + H+_mt              | AA catabolism   | 0.36                            | 0.41                | 0.37                             | 0.43                | No                        |
| R00939      | Dihydrofolate + NADPH + H+ = Tetrahydrofolate + NADP+                                                            | Central pathway | 0.03                            | 0.03                | 0.03                             | 0.03                | No                        |
| R00945      | 5,10-Methylenetetrahydrofolate + Glycine + H2O = Tetrahydrofolate + L-Serine                                     | Biosynthesis    | -2.22                           | -0.31               | -1.92                            | -0.38               | No                        |
| R00946      | 5-Methyltetrahydrofolate + L-Homocysteine = Tetrahydrofolate + L-Methionine                                      | Central pathway | 0.26                            | 0.39                | 0.27                             | 0.41                | No                        |
| R00959      | alpha-D-Glucose 1-phosphate = alpha-D-Glucose 6-phosphate                                                        | Biosynthesis    | -1.03                           | -0.34               | -1.10                            | -0.34               | No                        |
| R00965      | Orotidine 5'-phosphate = UMP + CO2                                                                               | Biosynthesis    | 0.21                            | 0.21                | 0.21                             | 0.21                | No                        |
| R01001      | L-Cystathionine + H2O = L-Cysteine + NH3 + 2-Oxobutanoate                                                        | AA catabolism   | 0.12                            | 0.17                | 0.10                             | 0.16                | No                        |
| R01015      | (2R)-2-Hydroxy-3-(phosphonoxy)-propanal = Glycerone phosphate                                                    | Central pathway | -59.35                          | -50.98              | -42.36                           | -31.16              | Yes                       |
| R01021      | ATP + Choline = ADP + Choline phosphate                                                                          | Biosynthesis    | 0.02                            | 1.60                | 0.02                             | 1.73                | No                        |
| R01049      | ATP + D-Ribose 5-phosphate = AMP + 5-Phospho-alpha-D-ribose 1-diphosphate                                        | Biosynthesis    | 0.43                            | 1.35                | 0.43                             | 1.42                | No                        |
| R01056      | D-Ribose 5-phosphate = D-Ribulose 5-phosphate                                                                    | Central pathway | -2.20                           | -0.25               | -1.82                            | -0.25               | No                        |
| R01061      | (2R)-2-Hydroxy-3-(phosphonoxy)-propanal + Orthophosphate + NAD+ = 3-Phospho-D-glyceroyl phosphate + NADH + H+    | Central pathway | 103.29                          | 107.50              | 63.58                            | 69.21               | Yes                       |
| R01070      | beta-D-Fructose 1,6-bisphosphate = Glycerone phosphate + (2R)-2-Hydroxy-3-(phosphonoxy)-propanal                 | Central pathway | 42.17                           | 52.49               | 19.82                            | 32.60               | Yes                       |
| R01072      | L-Glutamine + 5-Phospho-alpha-D-ribose 1-diphosphate + H2O = 5-Phosphoribosylamine + Pyrophosphate + L-Glutamate | Biosynthesis    | 0.22                            | 0.38                | 0.22                             | 0.38                | No                        |

| Reaction ID | Reaction                                                                                                        | Category        | Flux at 2% oxygen<br>(mmol/gDW) |                     | Flux at 20% oxygen<br>(mmol/gDW) |                     | Significant<br>difference |
|-------------|-----------------------------------------------------------------------------------------------------------------|-----------------|---------------------------------|---------------------|----------------------------------|---------------------|---------------------------|
|             |                                                                                                                 |                 | Lower & upper bound             | Lower & upper bound | Lower & upper bound              | Lower & upper bound |                           |
| R01082_mt   | (S)-Malate_mt = Fumarate_mt + H2O_mt                                                                            | Central pathway | -12.20                          | -1.15               | -17.74                           | -1.08               | No                        |
| R01082      | (S)-Malate = Fumarate + H2O                                                                                     | Central pathway | -12.53                          | -0.61               | -18.59                           | -0.66               | No                        |
| R01083      | N6-(1,2-Dicarboxyethyl)-AMP = Fumarate + AMP                                                                    | Biosynthesis    | 0.09                            | 1.49                | 0.09                             | 1.63                | No                        |
| R01090_mt   | L-Leucine_mt + 2-Oxoglutarate_mt = 4-Methyl-2-oxopentanoate_mt + L-Glutamate_mt                                 | AA catabolism   | 0.56                            | 0.60                | 0.49                             | 0.53                | Yes                       |
| R01121      | ATP + (R)-5-Diphosphomevalonate = ADP + Orthophosphate + Isopentenyl diphosphate + CO2                          | Biosynthesis    | 0.21                            | 0.21                | 0.21                             | 0.21                | No                        |
| R01123      | Isopentenyl diphosphate = Dimethylallyl diphosphate                                                             | Biosynthesis    | 0.07                            | 0.07                | 0.07                             | 0.07                | No                        |
| R01127      | IMP + H2O = 1-(5'-Phosphoribosyl)-5-formamido-4-imidazolecarboxamide                                            | Biosynthesis    | -0.38                           | -0.22               | -0.38                            | -0.22               | No                        |
| R01135      | GTP + IMP + L-Aspartate = GDP + Orthophosphate + N6-(1,2-Dicarboxyethyl)-AMP                                    | Biosynthesis    | 0.09                            | 1.49                | 0.09                             | 1.63                | No                        |
| R01137      | ATP + dADP = ADP + dATP                                                                                         | Biosynthesis    | 0.03                            | 1.43                | 0.03                             | 1.57                | No                        |
| R01168      | L-Histidine = Urocanate + NH3                                                                                   | AA catabolism   | 0.04                            | 0.10                | 0.04                             | 0.11                | No                        |
| R01185      | 1L-myo-Inositol 1-phosphate + H2O = myo-Inositol + Orthophosphate                                               | AA catabolism   | 0.02                            | 0.02                | 0.02                             | 0.02                | No                        |
| R01199_mt   | Oxidized ferredoxin_mt + 2-Oxobutanoate_mt + CoA_mt = Reduced ferredoxin_mt + Propanoyl-CoA_mt + CO2_mt         | AA catabolism   | 0.12                            | 0.41                | 0.10                             | 0.48                | No                        |
| R01214_mt   | L-Valine_mt + 2-Oxoglutarate_mt = 3-Methyl-2-oxobutanoic acid_mt + L-Glutamate_mt                               | AA catabolism   | 0.36                            | 0.41                | 0.37                             | 0.43                | No                        |
| R01220      | 5,10-Methylenetetrahydrofolate + NADP+ = 5,10-Methenyltetrahydrofolate + NADPH + H+                             | Central pathway | 0.35                            | 4.17                | 0.33                             | 3.40                | No                        |
| R01221      | Glycine + Tetrahydrofolate + NAD+ = 5,10-Methylenetetrahydrofolate + NH3 + CO2 + NADH + H+                      | AA catabolism   | 0.15                            | 2.25                | 0.03                             | 1.79                | No                        |
| R01231      | ATP + Xanthosine 5'-phosphate + L-Glutamine + H2O = AMP + Pyrophosphate + GMP + L-Glutamate                     | Biosynthesis    | 0.13                            | 0.78                | 0.13                             | 0.90                | No                        |
| R01281      | Palmitoyl-CoA + L-Serine = 3-Dehydrosphinganine + CoA + CO2                                                     | Biosynthesis    | 0.02                            | 0.02                | 0.02                             | 0.02                | No                        |
| R01290      | L-Serine + L-Homocysteine = L-Cystathionine + H2O                                                               | AA catabolism   | 0.12                            | 0.17                | 0.10                             | 0.16                | No                        |
| R01320      | S-Adenosyl-L-methionine + Phosphatidyl-N-dimethylethanolamine = S-Adenosyl-L-homocysteine + Phosphatidylcholine | Biosynthesis    | 0.14                            | 0.15                | 0.14                             | 0.15                | No                        |
| R01360_mt   | (S)-3-Hydroxy-3-methylglutaryl-CoA_mt = Acetyl-CoA_mt + Acetoacetate_mt                                         | AA catabolism   | 0.56                            | 2.00                | 0.49                             | 2.07                | No                        |
| R01364      | 4-Fumarylacetoacetate + H2O = Acetoacetate + Fumarate                                                           | AA catabolism   | 0.30                            | 0.34                | 0.34                             | 0.39                | Yes                       |
| R01397      | Carbamoyl phosphate + L-Aspartate = Orthophosphate + N-Carbamoyl-L-aspartate                                    | Biosynthesis    | 0.21                            | 0.21                | 0.21                             | 0.21                | No                        |
| R01456      | Cholesta-5,7-dien-3beta-ol + NADPH + H+ = Cholesterol + NADP+                                                   | Biosynthesis    | 0.03                            | 0.03                | 0.03                             | 0.03                | No                        |
| R01512      | ATP + 3-Phospho-D-glycerate = ADP + 3-Phospho-D-glyceroyl phosphate                                             | Central pathway | -107.51                         | -103.29             | -69.21                           | -63.58              | Yes                       |
| R01518      | 2-Phospho-D-glycerate = 3-Phospho-D-glycerate                                                                   | Central pathway | -105.01                         | -103.29             | -65.18                           | -63.58              | Yes                       |
| R01624      | Acetyl-CoA + Acyl-carrier protein = CoA + Acetyl-[acyl-carrier protein]                                         | Biosynthesis    | 0.46                            | 0.58                | 0.46                             | 0.61                | No                        |
| R01626      | Malonyl-CoA + Acyl-carrier protein = CoA + Malonyl-[acyl-carrier protein]                                       | Biosynthesis    | 3.67                            | 4.37                | 3.67                             | 4.59                | No                        |
| R01655      | 5,10-Methenyltetrahydrofolate + H2O = 10-Formyltetrahydrofolate + H+                                            | Central pathway | 0.35                            | 4.17                | 0.33                             | 3.40                | No                        |
| R01658      | Dimethylallyl diphosphate + Isopentenyl diphosphate = Pyrophosphate + Geranyl diphosphate                       | Biosynthesis    | 0.07                            | 0.07                | 0.07                             | 0.07                | No                        |
| R01786      | ATP + alpha-D-Glucose = ADP + alpha-D-Glucose 6-phosphate                                                       | Central pathway | 53.06                           | 54.50               | 33.16                            | 34.74               | Yes                       |
| R01794      | Dihydrobiopterin + NADPH + H+ = Tetrahydrobiopterin + NADP+                                                     | AA catabolism   | 0.15                            | 0.19                | 0.16                             | 0.21                | No                        |
| R01795      | Tetrahydrobiopterin + L-Phenylalanine + Oxygen = Dihydrobiopterin + L-Tyrosine + H2O                            | AA catabolism   | 0.15                            | 0.19                | 0.16                             | 0.21                | No                        |
| R01799      | CTP + Phosphatidate = Pyrophosphate + CDP-diacylglycerol                                                        | Biosynthesis    | 0.03                            | 0.03                | 0.03                             | 0.03                | No                        |
| R01801      | CDP-diacylglycerol + sn-Glycerol 3-phosphate = CMP + Phosphatidylglycerophosphate                               | Biosynthesis    | 0.01                            | 0.01                | 0.01                             | 0.01                | No                        |
| R01802      | CDP-diacylglycerol + myo-Inositol = CMP + 1-Phosphatidyl-D-myo-inositol                                         | Biosynthesis    | 0.02                            | 0.02                | 0.02                             | 0.02                | No                        |

| Reaction ID | Reaction                                                                                                                           | Category      | Flux at 2% oxygen<br>(mmol/gDW) |                     | Flux at 20% oxygen<br>(mmol/gDW) |                     | Significant<br>difference |
|-------------|------------------------------------------------------------------------------------------------------------------------------------|---------------|---------------------------------|---------------------|----------------------------------|---------------------|---------------------------|
|             |                                                                                                                                    |               | Lower & upper bound             | Lower & upper bound | Lower & upper bound              | Lower & upper bound |                           |
| R01857      | ATP + dGDP = ADP + dGTP                                                                                                            | Biosynthesis  | 0.02                            | 1.42                | 0.02                             | 1.56                | No                        |
| R01859_mt   | ATP_mt + Propanoyl-CoA_mt + HCO3-_mt = ADP_mt + Orthophosphate_mt + (S)-2-Methyl-3-oxopropanoyl-CoA_mt                             | AA catabolism | 1.15                            | 1.44                | 1.08                             | 1.46                | No                        |
| R01867      | (S)-Dihydroorotate + Oxygen = Orotate + H2O2                                                                                       | AA catabolism | 0.21                            | 0.21                | 0.21                             | 0.21                | No                        |
| R01870      | Orotate + 5-Phospho-alpha-D-ribose 1-diphosphate = Orotidine 5'-phosphate + Pyrophosphate                                          | AA catabolism | 0.21                            | 0.21                | 0.21                             | 0.21                | No                        |
| R01890      | CTP + Choline phosphate = Pyrophosphate + CDP-choline                                                                              | Biosynthesis  | 0.02                            | 0.90                | 0.02                             | 0.97                | No                        |
| R01891      | CDP-choline + N-Acylsphingosine = CMP + Sphingomyelin                                                                              | Biosynthesis  | 0.02                            | 0.71                | 0.02                             | 0.78                | No                        |
| R01938      | 2-Aminomuconate + NADPH + H+ + H2O = 2-Oxoadipate + NH3 + NADP+                                                                    | AA catabolism | 0.04                            | 0.06                | 0.06                             | 0.08                | No                        |
| R01939      | L-2-Amino adipate + 2-Oxoglutarate = 2-Oxoadipate + L-Glutamate                                                                    | AA catabolism | 0.30                            | 0.34                | 0.16                             | 0.21                | Yes                       |
| R01959      | L-Formylkynurenine + H2O = Formate + L-Kynurenine                                                                                  | AA catabolism | 0.04                            | 0.06                | 0.06                             | 0.08                | No                        |
| R01960      | L-Kynurenine + Oxygen + NADPH + H+ = 3-Hydroxy-L-kynurenine + NADP+ + H2O                                                          | AA catabolism | 0.04                            | 0.06                | 0.06                             | 0.08                | No                        |
| R01978      | Acetyl-CoA + H2O + Acetoacetyl-CoA = (S)-3-Hydroxy-3-methylglutaryl-CoA + CoA                                                      | Biosynthesis  | 0.21                            | 0.21                | 0.21                             | 0.21                | No                        |
| R01993      | (S)-Dihydroorotate + H2O = N-Carbamoyl-L-aspartate                                                                                 | Biosynthesis  | -0.21                           | -0.21               | -0.21                            | -0.21               | No                        |
| R02003      | Geranyl diphosphate + Isopentenyl diphosphate = Pyrophosphate + trans,trans-Farnesyl diphosphate                                   | Biosynthesis  | 0.07                            | 0.07                | 0.07                             | 0.07                | No                        |
| R02016      | Oxidized thioredoxin + NADPH + H+ = Thioredoxin + NADP+                                                                            | Biosynthesis  | 0.06                            | 0.48                | 0.06                             | 0.53                | No                        |
| R02017      | Thioredoxin + ADP = dADP + Oxidized thioredoxin + H2O                                                                              | Biosynthesis  | 0.03                            | 0.03                | 0.03                             | 0.03                | No                        |
| R02024      | Thioredoxin + CDP = dCDP + Oxidized thioredoxin + H2O                                                                              | Biosynthesis  | 0.02                            | 0.35                | 0.02                             | 0.39                | No                        |
| R02029      | Phosphatidylglycerophosphate + H2O = Phosphatidylglycerol + Orthophosphate                                                         | Biosynthesis  | 0.01                            | 0.01                | 0.01                             | 0.01                | No                        |
| R02055      | Phosphatidylserine = Phosphatidylethanolamine + CO2                                                                                | Biosynthesis  | 0.19                            | 0.19                | 0.19                             | 0.19                | No                        |
| R02056      | S-Adenosyl-L-methionine + Phosphatidylethanolamine = S-Adenosyl-L-homocysteine + Phosphatidyl-N-methylethanolamine                 | Biosynthesis  | 0.14                            | 0.15                | 0.14                             | 0.15                | No                        |
| R02082      | (S)-3-Hydroxy-3-methylglutaryl-CoA + 2 NADPH + 2 H+ = (R)-Mevalonate + CoA + 2 NADP+                                               | Biosynthesis  | 0.21                            | 0.21                | 0.21                             | 0.21                | No                        |
| R02085_mt   | (S)-3-Hydroxy-3-methylglutaryl-CoA_mt = 3-Methylglutaconyl-CoA_mt + H2O_mt                                                         | Biosynthesis  | -0.60                           | -0.56               | -0.53                            | -0.49               | Yes                       |
| R02093      | ATP + dTDP = ADP + dTTP                                                                                                            | Biosynthesis  | 0.03                            | 1.43                | 0.03                             | 1.57                | No                        |
| R02094      | ATP + dTMP = ADP + dTDP                                                                                                            | Biosynthesis  | 0.03                            | 1.43                | 0.03                             | 1.57                | No                        |
| R02101      | dUMP + 5,10-Methylenetetrahydrofolate = Dihydrofolate + dTMP                                                                       | Biosynthesis  | 0.03                            | 0.03                | 0.03                             | 0.03                | No                        |
| R02198_mt   | L-Isoleucine_mt + 2-Oxoglutarate_mt = 3-Methyl-2-oxopentanoate_mt + L-Glutamate_mt                                                 | AA catabolism | 0.58                            | 0.62                | 0.51                             | 0.55                | Yes                       |
| R02239      | Phosphatidate + H2O = 1,2-Diacyl-sn-glycerol + Orthophosphate                                                                      | Biosynthesis  | 0.18                            | 1.58                | 0.18                             | 1.72                | No                        |
| R02241      | 1-Acyl-sn-glycerol 3-phosphate + Acyl-CoA = Phosphatidate + CoA                                                                    | Biosynthesis  | 0.22                            | 0.68                | 0.22                             | 0.73                | No                        |
| R02245      | ATP + (R)-Mevalonate = ADP + (R)-5-Phosphomevalonate                                                                               | Biosynthesis  | 0.21                            | 0.21                | 0.21                             | 0.21                | No                        |
| R02313_mt   | N6-(L-1,3-Dicarboxypropyl)-L-lysine_mt + NAD+_mt + H2O_mt = L-Glutamate_mt + L-2-Amino adipate 6-semialdehyde_mt + NADH_mt + H+_mt | AA catabolism | 0.30                            | 0.34                | 0.16                             | 0.21                | Yes                       |
| R02326      | ATP + dCDP = ADP + dCTP                                                                                                            | Biosynthesis  | 0.02                            | 1.42                | 0.02                             | 1.56                | No                        |
| R02519      | Homogentisate + Oxygen = 4-Maleylacetoacetate                                                                                      | AA catabolism | 0.30                            | 0.34                | 0.34                             | 0.39                | Yes                       |
| R02521      | 3-(4-Hydroxyphenyl)pyruvate + Oxygen = Homogentisate + CO2                                                                         | AA catabolism | 0.30                            | 0.34                | 0.34                             | 0.39                | Yes                       |
| R02661_mt   | 2-Methylpropanoyl-CoA_mt + FAD_mt = 2-Methylprop-2-enoyl-CoA_mt + FADH2_mt                                                         | AA catabolism | 0.36                            | 0.41                | 0.37                             | 0.43                | No                        |
| R02662_mt   | 3-Methyl-2-oxobutanoic acid_mt + CoA_mt + NAD+_mt = 2-Methylpropanoyl-CoA_mt + CO2_mt + NADH_mt + H+_mt                            | AA catabolism | 0.36                            | 0.41                | 0.37                             | 0.43                | No                        |

| Reaction ID | Reaction                                                                                                                      | Category      | Flux at 2% oxygen<br>(mmol/gDW) |                     | Flux at 20% oxygen<br>(mmol/gDW) |                     | Significant<br>difference |
|-------------|-------------------------------------------------------------------------------------------------------------------------------|---------------|---------------------------------|---------------------|----------------------------------|---------------------|---------------------------|
|             |                                                                                                                               |               | Lower & upper bound             | Lower & upper bound | Lower & upper bound              | Lower & upper bound |                           |
| R02665      | 3-Hydroxyanthranilate + Oxygen = 2-Amino-3-carboxymuconate semialdehyde                                                       | AA catabolism | 0.04                            | 0.06                | 0.06                             | 0.08                | No                        |
| R02668      | 3-Hydroxy-L-kynurenine + H2O = 3-Hydroxyanthranilate + L-Alanine                                                              | AA catabolism | 0.04                            | 0.06                | 0.06                             | 0.08                | No                        |
| R02765_mt   | (R)-2-Methyl-3-oxopropanoyl-CoA_mt = (S)-2-Methyl-3-oxopropanoyl-CoA_mt                                                       | AA catabolism | -1.44                           | -1.15               | -1.46                            | -1.08               | No                        |
| R02814      | Oleoyl-[acyl-carrier protein] + H2O = Acyl-carrier protein + (9Z)-Octadecenoic acid                                           | Biosynthesis  | 0.45                            | 0.52                | 0.45                             | 0.53                | No                        |
| R02872      | Presqualene diphosphate + NADPH + H+ = Pyrophosphate + Squalene + NADP+                                                       | Biosynthesis  | 0.03                            | 0.03                | 0.03                             | 0.03                | No                        |
| R02874      | Squalene + Oxygen + NADPH + H+ = (S)-2,3-Epoxy-squalene + NADP+ + H2O                                                         | Biosynthesis  | 0.03                            | 0.03                | 0.03                             | 0.03                | No                        |
| R02914      | Urocanate + H2O = 4-Imidazolone-5-propanoate                                                                                  | AA catabolism | 0.04                            | 0.10                | 0.04                             | 0.11                | No                        |
| R02978      | 3-Dehydrosphinganine + NADPH + H+ = Sphinganine + NADP+                                                                       | Biosynthesis  | 0.02                            | 0.02                | 0.02                             | 0.02                | No                        |
| R03103      | L-2-Amino adipate 6-semialdehyde + NADP+ + H2O = L-2-Amino adipate + NADPH + H+                                               | AA catabolism | 0.30                            | 1.04                | 0.16                             | 0.98                | No                        |
| R03172_mt   | (S)-2-Methylbutanoyl-CoA_mt + FAD_mt = 2-Methylbut-2-enoyl-CoA_mt + FADH2_mt                                                  | AA catabolism | 0.58                            | 0.62                | 0.51                             | 0.55                | Yes                       |
| R03174_mt   | 3-Methyl-2-oxopentanoate_mt + CoA_mt + NAD+_mt = (S)-2-Methylbutanoyl-CoA_mt + CO2_mt + NADH_mt + H+_mt                       | AA catabolism | 0.58                            | 0.62                | 0.51                             | 0.55                | Yes                       |
| R03181      | 4-Maleylacetoacetate = 4-Fumarylacetoacetate                                                                                  | AA catabolism | 0.30                            | 0.34                | 0.34                             | 0.39                | Yes                       |
| R03199      | (S)-2,3-Epoxy-squalene = Lanosterol                                                                                           | Biosynthesis  | 0.03                            | 0.03                | 0.03                             | 0.03                | No                        |
| R03245      | ATP + (R)-5-Phosphomevalonate = ADP + (R)-5-Diphosphomevalonate                                                               | Biosynthesis  | 0.21                            | 0.21                | 0.21                             | 0.21                | No                        |
| R03370      | Octadecanoyl-[acyl-carrier protein] + Reduced acceptor + Oxygen = Oleoyl-[acyl-carrier protein] + Acceptor + 2 H2O            | Biosynthesis  | 0.45                            | 0.52                | 0.45                             | 0.53                | No                        |
| R03424      | S-Adenosyl-L-methionine + Phosphatidyl-N-methylethanolamine = S-Adenosyl-L-homocysteine + Phosphatidyl-N-dimethylethanolamine | Biosynthesis  | 0.14                            | 0.15                | 0.14                             | 0.15                | No                        |
| R03889      | 2-Aminomuconate semialdehyde + NAD+ + H2O = 2-Aminomuconate + H+ + NADH                                                       | AA catabolism | 0.04                            | 0.06                | 0.06                             | 0.08                | No                        |
| R04095_mt   | 3-Methylbutanoyl-CoA_mt + FAD_mt = 3-Methylcrotonyl-CoA_mt + FADH2_mt                                                         | AA catabolism | 0.56                            | 0.60                | 0.49                             | 0.53                | Yes                       |
| R04097_mt   | 4-Methyl-2-oxopentanoate_mt + CoA_mt + NAD+_mt = 3-Methylbutanoyl-CoA_mt + CO2_mt + NADH_mt + H+_mt                           | AA catabolism | 0.56                            | 0.60                | 0.49                             | 0.53                | Yes                       |
| R04138_mt   | ATP_mt + 3-Methylcrotonyl-CoA_mt + HCO3-_mt = ADP_mt + Orthophosphate_mt + 3-Methylglutaconyl-CoA_mt                          | AA catabolism | 0.56                            | 0.60                | 0.49                             | 0.53                | Yes                       |
| R04144      | ATP + 5-Phosphoribosylamine + Glycine = ADP + Orthophosphate + 5'-Phosphoribosylglycinamide                                   | Biosynthesis  | 0.22                            | 0.38                | 0.22                             | 0.38                | No                        |
| R04203_mt   | (2S,3S)-3-Hydroxy-2-methylbutanoyl-CoA_mt + NAD+_mt = 2-Methylacetoacetyl-CoA_mt + NADH_mt + H+_mt                            | AA catabolism | 0.58                            | 0.62                | 0.51                             | 0.55                | Yes                       |
| R04204_mt   | 2-Methylbut-2-enoyl-CoA_mt + H2O_mt = (2S,3S)-3-Hydroxy-2-methylbutanoyl-CoA_mt                                               | AA catabolism | 0.58                            | 0.62                | 0.51                             | 0.55                | Yes                       |
| R04208      | ATP + 2-(Formamido)-N1-(5'-phosphoribosyl)acetamidine = ADP + Orthophosphate + Aminoimidazole ribotide                        | Biosynthesis  | 0.22                            | 0.38                | 0.22                             | 0.38                | No                        |
| R04209      | 1-(5-Phospho-D-ribosyl)-5-amino-4-imidazolecarboxylate = Aminoimidazole ribotide + CO2                                        | Biosynthesis  | -0.38                           | -0.22               | -0.38                            | -0.22               | No                        |
| R04224_mt   | 2-Methylprop-2-enoyl-CoA_mt + H2O_mt = (S)-3-Hydroxyisobutyryl-CoA_mt                                                         | AA catabolism | 0.36                            | 0.41                | 0.37                             | 0.43                | No                        |
| R04323      | 2-Amino-3-carboxymuconate semialdehyde = 2-Aminomuconate semialdehyde + CO2                                                   | AA catabolism | 0.04                            | 0.06                | 0.06                             | 0.08                | No                        |
| R04325      | 10-Formyltetrahydrofolate + 5'-Phosphoribosylglycinamide = Tetrahydrofolate + 5'-Phosphoribosyl-N-formylglycinamide           | Biosynthesis  | 0.22                            | 0.38                | 0.22                             | 0.38                | No                        |
| R04355      | Acetyl-[acyl-carrier protein] + Malonyl-[acyl-carrier protein] = Acetoacetyl-[acp] + CO2 + Acyl-carrier protein               | Biosynthesis  | 0.46                            | 0.58                | 0.46                             | 0.61                | No                        |
| R04428      | (3R)-3-Hydroxybutanoyl-[acyl-carrier protein] = But-2-enoyl-[acyl-carrier protein] + H2O                                      | Biosynthesis  | 0.46                            | 0.58                | 0.46                             | 0.61                | No                        |



| Reaction ID | Reaction                                                                                                                                                             | Category        | Flux at 2% oxygen<br>(mmol/gDW) |                     | Flux at 20% oxygen<br>(mmol/gDW) |                     | Significant<br>difference |
|-------------|----------------------------------------------------------------------------------------------------------------------------------------------------------------------|-----------------|---------------------------------|---------------------|----------------------------------|---------------------|---------------------------|
|             |                                                                                                                                                                      |                 | Lower & upper bound             | Lower & upper bound | Lower & upper bound              | Lower & upper bound |                           |
| R04430      | But-2-enoyl-[acyl-carrier protein] + NADPH + H+ = Butyryl-[acp] + NADP+                                                                                              | Biosynthesis    | 0.46                            | 0.58                | 0.46                             | 0.61                | No                        |
| R04463      | ATP + 5'-Phosphoribosyl-N-formylglycinamide + L-Glutamine + H2O = ADP + Orthophosphate + 2-(Formamido)-N1-(5'-phosphoribosyl)acetamidine + L-Glutamate               | Biosynthesis    | 0.22                            | 0.38                | 0.22                             | 0.38                | No                        |
| R04533      | Acetoacetyl-[acp] + NADPH + H+ = (3R)-3-Hydroxybutanoyl-[acyl-carrier protein] + NADP+                                                                               | Biosynthesis    | 0.46                            | 0.58                | 0.46                             | 0.61                | No                        |
| R04534      | 3-Oxodecanoyl-[acp] + NADPH = (3R)-3-Hydroxydecanoyl-[acyl-carrier protein] + NADP+                                                                                  | Biosynthesis    | 0.46                            | 0.58                | 0.46                             | 0.61                | No                        |
| R04535      | (3R)-3-Hydroxydecanoyl-[acyl-carrier protein] = trans-Dec-2-enoyl-[acp] + H2O                                                                                        | Biosynthesis    | 0.46                            | 0.58                | 0.46                             | 0.61                | No                        |
| R04536      | 3-Oxoocatanoyl-[acp] + NADPH + H+ = (3R)-3-Hydroxyocatanoyl-[acyl-carrier protein] + NADP+                                                                           | Biosynthesis    | 0.46                            | 0.58                | 0.46                             | 0.61                | No                        |
| R04537      | (3R)-3-Hydroxyocatanoyl-[acyl-carrier protein] = trans-Oct-2-enoyl-[acp] + H2O                                                                                       | Biosynthesis    | 0.46                            | 0.58                | 0.46                             | 0.61                | No                        |
| R04543      | 3-Oxohexadecanoyl-[acp] + NADPH + H+ = (3R)-3-Hydroxypalmitoyl-[acyl-carrier protein] + NADP+                                                                        | Biosynthesis    | 0.46                            | 0.55                | 0.46                             | 0.57                | No                        |
| R04544      | (3R)-3-Hydroxypalmitoyl-[acyl-carrier protein] = trans-Hexadec-2-enoyl-[acp] + H2O                                                                                   | Biosynthesis    | 0.46                            | 0.55                | 0.46                             | 0.57                | No                        |
| R04559      | 1-(5'-Phosphoribosyl)-5-amino-4-(N-succinocarboxamide)-imidazole = Fumarate + 1-(5'-Phosphoribosyl)-5-amino-4-imidazolecarboxamide                                   | Biosynthesis    | 0.22                            | 0.38                | 0.22                             | 0.38                | No                        |
| R04560      | 10-Formyltetrahydrofolate + 1-(5'-Phosphoribosyl)-5-amino-4-imidazolecarboxamide = Tetrahydrofolate + 1-(5'-Phosphoribosyl)-5-formamido-4-imidazolecarboxamide       | Biosynthesis    | 0.22                            | 0.38                | 0.22                             | 0.38                | No                        |
| R04566      | 3-Oxotetradecanoyl-[acp] + NADPH = (3R)-3-Hydroxytetradecanoyl-[acyl-carrier protein] + NADP+                                                                        | Biosynthesis    | 0.46                            | 0.58                | 0.46                             | 0.61                | No                        |
| R04568      | (3R)-3-Hydroxytetradecanoyl-[acyl-carrier protein] = trans-Tetradec-2-enoyl-[acp] + H2O                                                                              | Biosynthesis    | 0.46                            | 0.58                | 0.46                             | 0.61                | No                        |
| R04591      | ATP + 1-(5-Phospho-D-ribosyl)-5-amino-4-imidazolecarboxylate + L-Aspartate = ADP + Orthophosphate + 1-(5'-Phosphoribosyl)-5-amino-4-(N-succinocarboxamide)-imidazole | Biosynthesis    | 0.22                            | 0.38                | 0.22                             | 0.38                | No                        |
| R04725      | trans-Dodec-2-enoyl-[acp] + NADPH + H+ = Dodecanoyl-[acyl-carrier protein] + NADP+                                                                                   | Biosynthesis    | 0.46                            | 0.58                | 0.46                             | 0.61                | No                        |
| R04726      | Dodecanoyl-[acyl-carrier protein] + Malonyl-[acyl-carrier protein] = 3-Oxotetradecanoyl-[acp] + CO2 + Acyl-carrier protein                                           | Biosynthesis    | 0.46                            | 0.58                | 0.46                             | 0.61                | No                        |
| R04779      | ATP + beta-D-Fructose 6-phosphate = ADP + beta-D-Fructose 1,6-bisphosphate                                                                                           | Central pathway | 42.17                           | 53.88               | 19.83                            | 34.12               | Yes                       |
| R04804      | Zymosterol = 5alpha-Cholesta-7,24-dien-3beta-ol                                                                                                                      | Biosynthesis    | 0.03                            | 0.03                | 0.03                             | 0.03                | No                        |
| R04952      | Butyryl-[acp] + Malonyl-[acyl-carrier protein] = 3-Oxohexanoyl-[acp] + CO2 + Acyl-carrier protein                                                                    | Biosynthesis    | 0.46                            | 0.58                | 0.46                             | 0.61                | No                        |
| R04953      | 3-Oxohexanoyl-[acp] + NADPH = (R)-3-Hydroxyhexanoyl-[acp] + NADP+                                                                                                    | Biosynthesis    | 0.46                            | 0.58                | 0.46                             | 0.61                | No                        |
| R04954      | (R)-3-Hydroxyhexanoyl-[acp] = trans-Hex-2-enoyl-[acp] + H2O                                                                                                          | Biosynthesis    | 0.46                            | 0.58                | 0.46                             | 0.61                | No                        |
| R04956      | trans-Hex-2-enoyl-[acp] + NADPH = Hexanoyl-[acp] + NADP+                                                                                                             | Biosynthesis    | 0.46                            | 0.58                | 0.46                             | 0.61                | No                        |
| R04957      | Hexanoyl-[acp] + Malonyl-[acyl-carrier protein] = 3-Oxoocatanoyl-[acp] + CO2 + Acyl-carrier protein                                                                  | Biosynthesis    | 0.46                            | 0.58                | 0.46                             | 0.61                | No                        |
| R04959      | trans-Oct-2-enoyl-[acp] + NADPH = Octanoyl-[acp] + NADP+                                                                                                             | Biosynthesis    | 0.46                            | 0.58                | 0.46                             | 0.61                | No                        |
| R04960      | Octanoyl-[acp] + Malonyl-[acyl-carrier protein] = 3-Oxodecanoyl-[acp] + CO2 + Acyl-carrier protein                                                                   | Biosynthesis    | 0.46                            | 0.58                | 0.46                             | 0.61                | No                        |
| R04962      | trans-Dec-2-enoyl-[acp] + NADPH = Decanoyl-[acp] + NADP+                                                                                                             | Biosynthesis    | 0.46                            | 0.58                | 0.46                             | 0.61                | No                        |
| R04963      | Decanoyl-[acp] + Malonyl-[acyl-carrier protein] = 3-Oxododecanoyl-[acp] + CO2 + Acyl-carrier protein                                                                 | Biosynthesis    | 0.46                            | 0.58                | 0.46                             | 0.61                | No                        |
| R04964      | 3-Oxododecanoyl-[acp] + NADPH = (R)-3-Hydroxydodecanoyl-[acp] + NADP+                                                                                                | Biosynthesis    | 0.46                            | 0.58                | 0.46                             | 0.61                | No                        |
| R04965      | (R)-3-Hydroxydodecanoyl-[acp] = trans-Dodec-2-enoyl-[acp] + H2O                                                                                                      | Biosynthesis    | 0.46                            | 0.58                | 0.46                             | 0.61                | No                        |

| Reaction ID | Reaction                                                                                                                 | Category        | Flux at 2% oxygen<br>(mmol/gDW) |                     | Flux at 20% oxygen<br>(mmol/gDW) |                     | Significant<br>difference |
|-------------|--------------------------------------------------------------------------------------------------------------------------|-----------------|---------------------------------|---------------------|----------------------------------|---------------------|---------------------------|
|             |                                                                                                                          |                 | Lower & upper bound             | Lower & upper bound | Lower & upper bound              | Lower & upper bound |                           |
| R04967      | trans-Tetradec-2-enoyl-[acp] + NADPH = Tetradecanoyl-[acp] + NADP+                                                       | Biosynthesis    | 0.46                            | 0.58                | 0.46                             | 0.61                | No                        |
| R04968      | Tetradecanoyl-[acp] + Malonyl-[acyl-carrier protein] = 3-Oxohexadecanoyl-[acp] + CO2 + Acyl-carrier protein              | Biosynthesis    | 0.46                            | 0.55                | 0.46                             | 0.57                | No                        |
| R04970      | trans-Hexadec-2-enoyl-[acp] + NADPH = Hexadecanoyl-[acp] + NADP+                                                         | Biosynthesis    | 0.46                            | 0.55                | 0.46                             | 0.57                | No                        |
| R05064_mt   | (S)-3-Hydroxyisobutyryl-CoA_mt + H2O_mt = CoA_mt + (S)-3-Hydroxyisobutyrate_mt                                           | AA catabolism   | 0.36                            | 0.41                | 0.37                             | 0.43                | No                        |
| R05066_mt   | (S)-3-Hydroxyisobutyrate_mt + NAD+_mt = (S)-Methylmalonate semialdehyde_mt + NADH_mt + H+_mt                             | AA catabolism   | 0.36                            | 0.41                | 0.37                             | 0.43                | No                        |
| R05639      | 14-Demethyllanosterol + NADP+ = 4,4-Dimethyl-5alpha-cholesta-8,14,24-trien-3beta-ol + NADPH + H+                         | Biosynthesis    | -0.03                           | -0.03               | -0.03                            | -0.03               | No                        |
| R05640      | Lanosterol + 3 Oxygen + 3 NADPH + 3 H+ = 4,4-Dimethyl-5alpha-cholesta-8,14,24-trien-3beta-ol + Formate + 3 NADP+ + 4 H2O | Biosynthesis    | 0.03                            | 0.03                | 0.03                             | 0.03                | No                        |
| R05703      | 5alpha-Cholesta-7,24-dien-3beta-ol + NADPH + H+ = 5alpha-Cholest-7-en-3beta-ol + NADP+                                   | Biosynthesis    | 0.03                            | 0.03                | 0.03                             | 0.03                | No                        |
| R05875_mt   | Reduced ferredoxin_mt + NAD+_mt = Oxidized ferredoxin_mt + NADH_mt + H+_mt                                               | Central pathway | 0.12                            | 0.41                | 0.10                             | 0.48                | No                        |
| R06517      | Acyl-CoA + Sphinganine = CoA + Dihydroceramide                                                                           | Biosynthesis    | 0.02                            | 0.71                | 0.02                             | 0.78                | No                        |
| R06519      | Dihydroceramide + Reduced acceptor + Oxygen = N-Acylsphingosine + Acceptor + 2 H2O                                       | Biosynthesis    | 0.02                            | 0.02                | 0.02                             | 0.02                | No                        |
| R07494      | 4alpha-Methylzymosterol-4-carboxylate + NADP+ = 3-Keto-4-methylzymosterol + NADPH + H+ + CO2                             | Biosynthesis    | 0.03                            | 0.03                | 0.03                             | 0.03                | No                        |
| R07495      | 3-Keto-4-methylzymosterol + NADP+ = 4alpha-Methylzymosterol + NADPH + H+                                                 | Biosynthesis    | 0.03                            | 0.03                | 0.03                             | 0.03                | No                        |
| R07496      | 4alpha-Methylzymosterol = Zymosterol                                                                                     | Biosynthesis    | 0.03                            | 0.03                | 0.03                             | 0.03                | No                        |
| R07509      | 14-Demethyllanosterol + NADPH + H+ + CO2 = 4alpha-Methylzymosterol-4-carboxylate + NADP+ + H2O                           | Biosynthesis    | 0.03                            | 0.03                | 0.03                             | 0.03                | No                        |
| EF0013      | Glycine_ext = Glycine                                                                                                    | Exchange        | 0.26                            | 0.39                | 0.00                             | 0.15                | Yes                       |
| EF0016      | L-Proline_ext = L-Proline                                                                                                | Exchange        | -0.23                           | -0.18               | -0.01                            | 0.05                | Yes                       |
| TF0007      | L-Glutamate + L-Aspartate_mt = L-Glutamate_mt + L-Aspartate                                                              | Transport       | 1.95                            | 27.10               | -2.61                            | 31.30               | No                        |
| R00342      | (S)-Malate + NAD+ = Oxaloacetate + NADH + H+                                                                             | Central pathway | -21.71                          | -1.54               | -24.86                           | 3.28                | No                        |
| R00355      | L-Aspartate + 2-Oxoglutarate = Oxaloacetate + L-Glutamate                                                                | Central pathway | 1.54                            | 26.69               | -3.28                            | 30.63               | No                        |
| R00355_mt   | L-Aspartate_mt + 2-Oxoglutarate_mt = Oxaloacetate_mt + L-Glutamate_mt                                                    | Central pathway | -27.10                          | -1.95               | -31.30                           | 2.61                | No                        |
| R00485      | L-Asparagine + H2O = L-Aspartate + NH3                                                                                   | AA catabolism   | 0.04                            | 0.81                | 0.00                             | 0.77                | No                        |
| EF0014      | H+_ext = H+                                                                                                              | Exchange        | -5.85                           | 13.64               | 1.44                             | 24.76               | No                        |

Note: Reaction ID or component followed by ‘\_mt’ indicates that the reaction takes place or the reactant is located within the mitochondria.
